# Supplementary material for: Substantial water retained early in Earth’s deep mantle
Source: Research Square preprint supplement (doi:10.21203/rs.3.rs-2830893/v1), 2023-05-24
Supplement: Supplementary file 1 [file 4f4f64cd4600f99fff915d1d.xlsx]

## Sheet: Contents
	Supplementary Data Tables for “Substantial water retained early in Earth’s deep mantle"
	Authors: Wenhua Lu✉, Zhixue Du✉, Ya-Nan Yang✉, Yuan Li ✉: wenhualu@gig.ac.cn; duzhixue@gig.ac.cn; yangyn@gig.ac.cn.
	Data tables containing raw and processed data collected by NanoSIMS:
	0. Summary of measured water contents and D_H2O.
	1. NanoSIMS calibration curves for session 1.
	2. NanoSIMS calibration curves for session 2.
	3. Mean 16O1H/30Si of ROIs and its distribution map for HYM18P1.
	4. Mean 16O1H/30Si of ROIs and its distribution map for HYM18P2.
	5. Mean 16O1H/30Si of ROIs and its distribution map for HYM19P2.
	6. Mean 16O1H/30Si of ROIs and its distribution map for HYM20P2.
	7. Mean 16O1H/30Si of ROIs and its distribution map for HYM21P3.
	8. Mean 16O1H/30Si of ROIs and its distribution map for HYM23P1.
	9. Mean 16O1H/30Si of ROIs and its distribution map for HYM23P2.
	10. Mean 16O1H/30Si of ROIs and its distribution map for HYM24.
	11. Mean 16O1H/30Si of ROIs and its distribution map for HYM29P1 (Session 2).
	12. Mean 16O1H/30Si of ROIs and its distribution map for DACY1P1.
	13. Mean 16O1H/30Si of ROIs and its distribution map for DACY1P2.

## Sheet: 0. Summary
Session No.	Run	P (GPa)	SD	T (K)	SD	Bridgmanite 16O1H/30Si	Weighted. SD	Melt 16O1H/30Si	Weighted. SD	Bridgmanite (ppmw)	SD	Melt (ppmw)	SD	D_H2O	SD	SiO2% in melt	104/T	SD	log10D_H2O	SD
1	HYM18P1	36.2886	4	3917.5	103.35	0.0333289	0.00744306	0.929875	0.0323719	261.035	58.2948	6140.8	213.781	0.0425083	0.00960768	0.471472	2.55265	0.0673431	-1.37153	0.0981588
1	HYM18P2	37.2313	4	3875	107.529	0.0250263	0.00871347	1.10998	0.0580423	196.009	68.2447	7206.82	376.855	0.0271977	0.00957567	0.463537	2.58065	0.0716114	-1.56547	0.152905
1	HYM19P2	41.1496	3	3777.5	76.1988	0.0258197	0.00457894	1.05748	0.0728258	202.222	35.8627	6718.45	462.682	0.0300996	0.0057263	0.453578	2.64725	0.0533997	-1.52144	0.0826225
1	HYM20P2	43.6969	4	3812.5	80.0391	0.0306667	0.00333939	1.11211	0.102287	240.184	26.1544	6845.42	629.611	0.0350869	0.00500123	0.439447	2.62295	0.0550658	-1.45486	0.0619036
1	HYM21P3	48.2646	1	3677.5	79.5692	0.0720557	0.0177148	3.86007	0.451735	564.348	138.744	22548.3	2638.77	0.0250284	0.00681476	0.417036	2.71924	0.0588355	-1.60157	0.11825
1	HYM23P1	56.3131	4	4087.5	115.244	0.0218951	0.00323436	0.571051	0.052005	171.485	25.3318	3885.52	353.85	0.0441343	0.00765891	0.485768	2.44648	0.0689769	-1.35522	0.075366
1	HYM23P2	57.7338	3	4325	106.066	0.0459405	0.00827858	0.651182	0.0599617	359.811	64.8386	4498.06	414.187	0.0799924	0.0161877	0.493148	2.31214	0.0567027	-1.09695	0.0878862
1	HYM24	71.244	1	4440	88.3883	0.0312553	0.00496221	0.424407	0.0342685	244.795	38.8646	2808.14	226.741	0.0871734	0.015527	0.472379	2.25225	0.0448362	-1.05962	0.0773551
2	HYM29P1	64.7881	5	4287.5	117.925	0.0240138	0.00471045	0.296935	0.0234155	280.217	54.9663	3293.22	259.695	0.0850891	0.017989	0.489592	2.33236	0.06415	-1.07013	0.0918157
1	DACY1NanoP1	40	3	3625	106.066	0.197077	0.018738	12.1171	0.871278	1543.53	146.758	63874.4	4592.86	0.024165	0.00288065	0.376341	2.75862	0.0807161	-1.61681	0.0517712
1	DACY1NanoP2	40	3	3680	74.3303	0.252662	0.0169403	10.7819	0.54132	1978.88	132.679	58792.8	2951.77	0.0336585	0.00281929	0.389299	2.71739	0.0548871	-1.47291	0.0363773
	Y23_SC02*	33	1	3690	120					1099	14	44226	834	0.0248496	0.000565508	0.447012	2.71003	0.088131	-1.60468	0.00988333
										Calibration slope
										Bridgmanite	melt
								session 1		7832.1	14007
								session 2		11669	22653
*Yang Y-N, Du Z, Lu W, et al., 2023. NanoSIMS Analysis of Water Content in Bridgmanite at the Micron Scale: An Experimental Approach to Probe Water in Earth’s Deep Mantle[J]. Frontiers in Chemistry, 11.

## Sheet: 1. NanoSIMS session_1 standards
Basaltic glass
Sample Name	SiO2(wt.%)	16O1H/30Si ratio	16O1H/30Si error( %)	16O1H/30Siaverage*	16O1H/30Si corr *	16OH/30Sicorr x SiO2(wt.%)	1SD	H2O (ppmw, ref.)*	1SD
glass
ALV519-1-4_1	49.1	0.241244	0.069	0.240727	0.240162	0.11792	0.00646176	1700	43
ALV519-1-4_2		0.238801	0.0778
ALV519-1-4_3		0.238801	0.0778
ALV519-1-4_4		0.234646	0.086
ALV519-1-4_5		0.232991	0.0697
ALV519-1-4_6		0.253858	0.0729
ALV519-1-4_7		0.244643	0.07
ALV519-1-4_8		0.240836	0.0811
G316-02_1	40	0.620071	0.0519	0.626946	0.626381	0.250553	0.0161603	3400	100
G316-02_2		0.607902	0.0555
G316-02_3		0.606058	0.0527
G316-02_4		0.656689	0.0523
G316-02_5		0.63311	0.0465
G316-02_6		0.631955	0.0506
G316-02_7		0.632786	0.05
		0.627
G318-04_1	38.9	0.937234	0.0553	0.972023	0.971458	0.377897	0.0251242	5500	100
G318-04_2		0.944694	0.0445
G318-04_3		1.01064	0.045
G318-04_4		0.978455	0.0432
G318-04_5		0.968289	0.0496
G318-04_6		0.988223	0.0548
G318-04_7		0.976626	0.0475
G320-06_1	46.6	0.41446	0.0663	0.427092	0.426527	0.198761	0.00835919	2500	100
G320-06_2		0.419164	0.0595
G320-06_3		0.429095	0.0599
G320-06_4		0.434673	0.068
G320-06_5		0.434201	0.0579
G320-06_6		0.430957	0.0613
Orthopyroxene
Sample Name		16O1H/30Si ratio	16O1H/30Si err (%)	16O1H/30Si average ratio	16O1H/30Si corr	1SD		H2O(ppmw, ref.)	1SD
NMNH 116610-29_1		0.00738383	0.244	0.00733278	0.00676773	0.000130524		55	3
NMNH 116610-29_2		0.00743007	0.234
NMNH 116610-29_3		0.00718445	0.228
NMNH 116610-18_2		0.0105383	0.191	0.010407	0.00984195	0.000270782		82	6
NMNH 116610-18_3		0.0100956	0.194
NMNH 116610-18_4		0.0105871	0.187
NMNH 117322-245_1		0.0274559	0.136	0.0269693	0.0264043	0.000474132		210	11
NMNH 117322-245_2		0.0269434	0.115
NMNH 117322-245_3		0.0265087	0.195
NMNH 116610-5_1		0.0341186	0.0988	0.0349434	0.0343784	0.000733577		265	21
NMNH 116610-5_2		0.0351889	0.106
NMNH 116610-5_3		0.0355228	0.11
Suprasil 3002
Sample Name		16O1H/30Si ratio	16O1H/30Si err (%)	16O1H/30Siaverage	H2O (ppmw, cal.)*	average (ppmw)	1SD (ppmw)
Suprasil 3002_1		0.000402094	2.15	0.000565052	5.66229	7.95707	1.37969
Suprasil 3002_2		0.000519347	1.91		7.31344
Suprasil 3002_3		0.000514362	1.95		7.24325
Suprasil 3002_4		0.000647039	2.13		9.1116
Suprasil 3002_5		0.000744402	2.05		10.4827
Suprasil 3002_6		0.000526239	2.02		7.4105
Suprasil 3002_7		0.000668739	1.86		9.41718
Suprasil 3002_8		0.000549402	2.17		7.73668
Suprasil 3002_9		0.000574646	2.17		8.09216
Suprasil 3002_10		0.000504253	1.95		7.10089
*Note:
16O1H/30Siaverage refers to average ratio
16O1H/30Sicorr refers to average ratio that has beed corrected background using the average valure of Suprasil 3002
H2O (ppmw, ref.) means recommended water contents for each standard.
H2O (ppmw, cal.) refers to calculated water contents for Suprasil 3002 using the calibration slope for melt established by glass standards.
Water reference value for glass ALV-519-4-1 is from Hauri et al. 2002 and Kumamoto et al. 2017
Water reference values for glasses G316, G318, and G320 are from Li et al. 2015
Water reference valures for orthopyroxene is from Yang et al. 2023
Hauri, E. et al., 2002. SIMS analysis of volatiles in silicate glasses: 1. Calibration, matrix effects and comparisons with FTIR. Chemical Geology, 183(1-4): 99-114.
Kumamoto, K.M., Warren, J.M. and Hauri, E.H., 2017. New SIMS reference materials for measuring water in upper mantle minerals. American Mineralogist, 102(3): 537-547.
Li, Y., Dasgupta, R. and Tsuno, K., 2015. The effects of sulfur, silicon, water, and oxygen fugacity on carbon solubility and partitioning in Fe-rich alloy and silicate melt systems at 3 GPa and 1600 °C: Implications for core–mantle differentiation and degassing of magma oceans and reduced planetary mantles. Earth and Planetary Science Letters, 415: 54-66.
Yang Y-N, Du Z, Lu W, et al., 2023. NanoSIMS Analysis of Water Content in Bridgmanite at the Micron Scale: An Experimental Approach to Probe Water in Earth’s Deep Mantle[J]. Frontiers in Chemistry, 11.

## Sheet: 2. NanoSIMS session_2 standards
Basaltic glass
Sample Name	SiO2(wt.%)	16O1H/30Si ratio	16O1H/30Si err (%)	16O1H/30Siaverage*	16O1H/30Si corr *	16OH/30Sicorr x SiO2(wt.%)	1SD	H2O (ppmw, ref.)*	1SD
FJ-G2_1	49.6	0.207096	0.07	0.207269	0.207187	0.102765	0.000796505	2300	138
FJ-G2_2	49.6	0.208954	0.07
FJ-G2_3	49.6	0.205757	0.07
EPR-G3_1	50.2	0.209282	0.06	0.209293	0.209211	0.105024	4.81486e-05	2200	154
EPR-G3_2	50.2	0.209204	0.07
EPR-G3_3	50.2	0.209395	0.07
IND-G1_1	50.1	0.469868	0.05	0.470139	0.470057	0.235499	0.000118553	5000	50
IND-G1_2	50.1	0.470302	0.05
IND-G1_3	50.1	0.470248	0.05
IND-G2_1	50.6	0.50041	0.05	0.49805	0.497968	0.251972	0.00103527	5000	150
IND-G2_2	50.6	0.496958	0.05
IND-G2_3	50.6	0.496781	0.05
HW-G1_1	46.3	1.33134	0.04	1.32981	1.32973	0.615664	0.00192899	14400	432
HW-G1_2	46.3	1.3251	0.04
HW-G1_3	46.3	1.333	0.04
Orthopyroxene
Sample Name		16O1H/30Si ratio	16O1H/30Si err (%)	16O1H/30Siaverage	16O1H/30Si corr		1SD	H2O (ppmw, ref.)	1SD
116610-29		0.00496276	0.41	0.00479148	0.00470945		0.000242231	55	3
		0.00462019	0.42
116610-18		0.00710706	0.33	0.00719718	0.00711515		0.000127449	82	6
		0.0072873	0.33
117322-245		0.0189997	0.32	0.0191068	0.0190248		0.000151511	210	11
		0.019214	0.26
116610-5		0.0214914	0.2	0.0218675	0.0217855		0.000531885	265	21
		0.0222436	0.19
Suprasil 3002
Sample Name		16O1H/30Si ratio	16O1H/30Si err (%)	16O1H/30Siaverage	H2O (ppmw, cal.)*	average (ppmw)	1SD
Suprasil 3002_1		9.33982e-05	5.02	8.20297e-05	2.11575	1.85846	0.276912
Suprasil 3002_2		7.93605e-05	8.67		1.79775
Suprasil 3002_3		7.95519e-05	9.45		1.80209
Suprasil 3002_4		8.22206e-05	8.7		1.86254
Suprasil 3002_5		7.11419e-05	8.08		1.61158
Suprasil 3002_6		6.18603e-05	14.29		1.40132
Suprasil 3002_7		0.000100452	15.62		2.27554
Suprasil 3002_8		8.82519e-05	13.74		1.99917
*Note:
16O1H/30Siaverage refers to average ratio
16O1H/30Sicorr refers to average ratio that has beed corrected background using the average valure of Suprasil 3002
H2O (ppm, ref.) means recommended water contents for each standard.
H2O (ppm, cal.) refers to calculated water contents for Suprasil 3002 using the calibration slope for melt established by glass standards.
Water reference values for glasses are from Shimizu et al. 2017
Water reference valures for orthopyroxene is from Yang et al. 2023
Shimizu, K. et al., 2017. H2O, CO2, F, S, Cl, and P2O5 analyses of silicate glasses using SIMS: Report of volatile standard glasses. GEOCHEMICAL JOURNAL, 51: 299-313.
Yang Y-N, Du Z, Lu W, et al., 2023. NanoSIMS Analysis of Water Content in Bridgmanite at the Micron Scale: An Experimental Approach to Probe Water in Earth’s Deep Mantle[J]. Frontiers in Chemistry, 11.

## Sheet: 3. HYM18P1
ROI No.	ROI area (μm2)	Relative weight%	Mean 16O1H/30Si	(Mean - Weighted average)2		Bridgmanite 16O1H/30Si	Weighted. SD	Melt 16O1H/30Si	Weighted. SD
1	3.049	0.0536013	0.035	2.79268e-06		0.0333289	0.00744306	0.929875	0.0323719		Raster size: 30 x 30 µm, Image size: 256 x 256 pixels
2	3.104	0.0545681	0.04	4.4504e-05
3	3.214	0.0565019	0.034	4.50418e-07
4	3.255	0.0572227	0.035	2.79268e-06
5	3.31	0.0581896	0.054	0.000427296
6	3.255	0.0572227	0.045	0.000136215
7	3.337	0.0586643	0.036	7.13495e-06
8	3.117	0.0547967	0.023	0.000106686
9	3.131	0.0550428	0.027	4.00546e-05
10	3.104	0.0545681	0.028	2.83968e-05
11	3.145	0.0552889	0.029	1.87391e-05
12	3.172	0.0557636	0.029	1.87391e-05
13	3.241	0.0569766	0.027	4.00546e-05
14	3.227	0.0567305	0.033	1.08154e-07
15	3.062	0.0538298	0.031	5.42363e-06
16	3.062	0.0538298	0.032	1.76589e-06
17	3.008	0.0528805	0.027	4.00546e-05
18	3.09	0.054322	0.033	1.08154e-07
19	3.969	0.0208333	0.919	0.000118266
20	3.969	0.0208333	0.936	3.75156e-05
21	3.969	0.0208333	0.92	9.75156e-05
22	3.969	0.0208333	0.978	0.00231602
23	3.969	0.0208333	0.923	4.72656e-05
24	3.969	0.0208333	0.926	1.50156e-05
25	3.969	0.0208333	0.926	1.50156e-05
26	3.969	0.0208333	0.95	0.000405016
27	3.969	0.0208333	0.931	1.26562e-06
28	3.969	0.0208333	0.881	0.00238877
29	3.969	0.0208333	0.934	1.70156e-05
30	3.969	0.0208333	0.972	0.00177452
31	3.969	0.0208333	0.935	2.62656e-05
32	3.969	0.0208333	0.953	0.000534766
33	3.969	0.0208333	0.919	0.000118266
34	3.969	0.0208333	0.933	9.76562e-06
35	3.969	0.0208333	0.944	0.000199516
36	3.969	0.0208333	0.945	0.000228766
37	3.969	0.0208333	1.018	0.00776602
38	3.969	0.0208333	0.948	0.000328516
39	3.969	0.0208333	0.928	3.51563e-06
40	3.969	0.0208333	0.943	0.000172266
41	3.969	0.0208333	0.919	0.000118266
42	3.969	0.0208333	0.939	8.32656e-05
43	3.969	0.0208333	1.001	0.00505877
44	3.969	0.0208333	1.013	0.00690977
45	3.969	0.0208333	0.966	0.00130502
46	3.969	0.0208333	0.934	1.70156e-05
47	3.969	0.0208333	0.911	0.000356266
48	3.969	0.0208333	0.917	0.000165766
49	3.969	0.0208333	0.94	0.000102516
50	3.969	0.0208333	0.977	0.00222077
51	3.969	0.0208333	0.948	0.000328516
52	3.969	0.0208333	0.88	0.00248752
53	3.969	0.0208333	0.914	0.000252016
54	3.969	0.0208333	0.908	0.000478516
55	3.969	0.0208333	0.908	0.000478516
56	3.969	0.0208333	0.9	0.000892516
57	3.969	0.0208333	0.919	0.000118266
58	3.969	0.0208333	0.884	0.00210452
59	3.969	0.0208333	0.913	0.000284766
60	3.969	0.0208333	0.908	0.000478516
61	3.969	0.0208333	0.898	0.00101602
62	3.969	0.0208333	0.882	0.00229202
63	3.969	0.0208333	0.87	0.00358502
64	3.969	0.0208333	0.907	0.000523266
65	3.969	0.0208333	0.905	0.000618766
66	3.969	0.0208333	0.911	0.000356266

## Sheet: 4. HYM18P2
ROI No.	ROI area (μm2)	Relative weight%	Mean 16O1H/30Si	(Mean - Weighted average)2		Bridgmanite 16O1H/30Si	Weighted. SD	Melt 16O1H/30Si	Weighted. SD
1	4.216	0.0666962	0.036	0.000120422		0.0250263	0.00871347	1.10998	0.0580423		Raster size: 30 x 30 µm, Image size: 256 x 256 pixels
2	4.408	0.0697336	0.038	0.000168317
3	4.532	0.0716952	0.043	0.000323054
4	4.449	0.0703822	0.029	1.57902e-05
5	4.408	0.0697336	0.027	3.89546e-06
6	4.628	0.0732139	0.023	4.10593e-06
7	4.765	0.0753813	0.02	2.52638e-05
8	4.669	0.0738626	0.017	6.44216e-05
9	4.601	0.0727868	0.027	3.89546e-06
10	4.559	0.0721224	0.014	0.000121579
11	4.546	0.0719167	0.022	9.15854e-06
12	4.504	0.0712523	0.019	3.63164e-05
13	4.436	0.0701765	0.021	1.62112e-05
14	4.491	0.0710466	0.016	8.14742e-05
15	3.969	0.0193493	1.22	0.0121051
16	3.969	0.0193493	1.193	0.00689283
17	3.969	0.0193493	1.202	0.00846824
18	3.969	0.0193493	1.154	0.00193803
19	3.969	0.0193493	1.143	0.00109052
20	3.969	0.0193493	1.084	0.000674802
21	3.969	0.0193493	1.126	0.000256738
22	3.969	0.0193493	1.197	0.00757301
23	3.969	0.0193493	1.19	0.00640369
24	3.969	0.0193493	1.222	0.0125492
25	3.969	0.0193493	1.202	0.00846824
26	3.969	0.0193493	1.183	0.00533237
27	3.969	0.0193493	1.138	0.000785291
28	3.969	0.0193493	1.087	0.00052794
29	3.969	0.0193493	1.059	0.00259865
30	3.969	0.0193493	1.025	0.00722108
31	3.969	0.0193493	1.09	0.000399079
32	3.969	0.0193493	1.134	0.000577107
33	3.969	0.0193493	1.133	0.000530061
34	3.969	0.0193493	1.19	0.00640369
35	3.969	0.0193493	1.121	0.000121508
36	3.969	0.0193493	1.126	0.000256738
37	3.969	0.0193493	1.111	1.04662e-06
38	3.969	0.0193493	1.059	0.00259865
39	3.969	0.0193493	1.042	0.00462087
40	3.969	0.0193493	1.056	0.00291351
41	3.969	0.0193493	1.048	0.00384114
42	3.969	0.0193493	1.114	1.61849e-05
43	3.969	0.0193493	1.093	0.000288217
44	3.969	0.0193493	1.089	0.000440033
45	3.969	0.0193493	1.153	0.00185098
46	3.969	0.0193493	1.016	0.00883167
47	3.969	0.0193493	1.056	0.00291351
48	3.969	0.0193493	1.006	0.0108112
49	3.969	0.0193493	1.005	0.0110202
50	3.969	0.0193493	1.121	0.000121508
51	3.969	0.0193493	1.106	1.58162e-05
52	3.969	0.0193493	1.143	0.00109052
53	3.969	0.0193493	1.038	0.00518068
54	14.612	0.071235	1.142	0.00102548
55	3.969	0.0193493	1.024	0.00739204
56	3.969	0.0193493	1.051	0.00347828
57	3.969	0.0193493	1.095	0.000224309
58	3.969	0.0193493	1.079	0.000959572
59	3.969	0.0193493	1.06	0.0024977
60	3.969	0.0193493	1.1	9.95396e-05
61	3.969	0.0193493	1.079	0.000959572
62	3.969	0.0193493	1.059	0.00259865
63	3.969	0.0193493	1.139	0.000842337

## Sheet: 5. HYM19P2 
ROI No.	ROI area (μm2)	Relative weight%	Mean 16O1H/30Si	(Mean - Weighted average)2		Bridgmanite 16O1H/30Si	Weighted. SD	Melt 16O1H/30Si	Weighted. SD
1	3.323	0.0789705	0.032	3.81962e-05		0.0258197	0.00457894	1.05748	0.0728258		Raster size: 30 x 30 µm, Image size: 256 x 256 pixels
2	3.708	0.08812	0.03	1.74749e-05
3	3.667	0.0871456	0.029	1.01143e-05
4	3.763	0.089427	0.027	1.39312e-06
5	4.82	0.114546	0.03	1.74749e-05
6	5.219	0.124029	0.026	3.25094e-08
7	5.26	0.125003	0.022	1.45901e-05
8	4.683	0.111291	0.019	4.65083e-05
9	3.777	0.0897597	0.019	4.65083e-05
10	3.859	0.0917085	0.027	1.39312e-06
11	3.969	0.04	0.957	0.0100962
12	3.969	0.04	0.979	0.00615911
13	3.969	0.04	1.023	0.00118887
14	3.969	0.04	1.023	0.00118887
15	3.969	0.04	1.103	0.00207207
16	3.969	0.04	1.128	0.00497307
17	3.969	0.04	1.159	0.0103063
18	3.969	0.04	1.121	0.00403479
19	3.969	0.04	1.053	2.00704e-05
20	3.969	0.04	1.118	0.00366267
21	3.969	0.04	1.159	0.0103063
22	3.969	0.04	1.169	0.0124367
23	3.969	0.04	1.076	0.00034299
24	3.969	0.04	1.043	0.00020967
25	3.969	0.04	1.126	0.00469499
26	3.969	0.04	1.141	0.00697559
27	3.969	0.04	1.108	0.00255227
28	3.969	0.04	1.002	0.00307803
29	3.969	0.04	0.983	0.00554727
30	3.969	0.04	1.06	6.3504e-06
31	3.969	0.04	1.053	2.00704e-05
32	3.969	0.04	0.993	0.00415767
33	3.969	0.04	0.975	0.00680295
34	3.969	0.04	0.945	0.0126518
35	3.969	0.04	0.94	0.0138016

## Sheet: 6. HYM20P2
ROI No.	ROI area (μm2)	Relative weight%	Mean 16O1H/30Si	(Mean - Weighted average)2		Bridgmanite 16O1H/30Si	Weighted. SD	Melt 16O1H/30Si	Weighted. SD
1	4.202	0.0833333	0.024	4.44444e-05		0.0306667	0.00333939	1.11211	0.102287		Raster size: 30 x 30 µm, Image size: 256 x 256 pixels
2	4.202	0.0833333	0.025	3.21111e-05
3	4.202	0.0833333	0.029	2.77778e-06
4	4.202	0.0833333	0.03	4.44444e-07
5	4.202	0.0833333	0.031	1.11111e-07
6	4.202	0.0833333	0.031	1.11111e-07
7	4.202	0.0833333	0.033	5.44444e-06
8	4.202	0.0833333	0.032	1.77778e-06
9	4.202	0.0833333	0.033	5.44444e-06
10	4.202	0.0833333	0.035	1.87778e-05
11	4.202	0.0833333	0.031	1.11111e-07
12	4.202	0.0833333	0.034	1.11111e-05
13	3.969	0.0277778	1.283	0.029203
14	3.969	0.0277778	1.231	0.0141346
15	3.969	0.0277778	1.111	1.23457e-06
16	3.969	0.0277778	1.087	0.000630568
17	3.969	0.0277778	1.073	0.00152968
18	3.969	0.0277778	1.07	0.00177335
19	3.969	0.0277778	1.062	0.00251112
20	3.969	0.0277778	1.03	0.00674223
21	3.969	0.0277778	1.085	0.000735012
22	3.969	0.0277778	1.387	0.0755639
23	3.969	0.0277778	1.261	0.0221679
24	3.969	0.0277778	1.106	3.73457e-05
25	3.969	0.0277778	1.087	0.000630568
26	3.969	0.0277778	1.051	0.00373457
27	3.969	0.0277778	1.049	0.00398301
28	3.969	0.0277778	1.02	0.00848446
29	3.969	0.0277778	1.018	0.0088569
30	3.969	0.0277778	1.045	0.0045039
31	3.969	0.0277778	1.011	0.0102235
32	3.969	0.0277778	1.012	0.0100222
33	3.969	0.0277778	1.035	0.00594612
34	3.969	0.0277778	1.044	0.00463912
35	3.969	0.0277778	1.056	0.00314846
36	3.969	0.0277778	1.096	0.000259568
37	3.969	0.0277778	1.17	0.00335112
38	3.969	0.0277778	1.415	0.0917417
39	3.969	0.0277778	1.258	0.0212836
40	3.969	0.0277778	1.114	3.5679e-06
41	3.969	0.0277778	1.062	0.00251112
42	3.969	0.0277778	1.061	0.00261235
43	3.969	0.0277778	1.032	0.00641779
44	3.969	0.0277778	1.015	0.00943057
45	3.969	0.0277778	1.197	0.00720612
46	3.969	0.0277778	1.156	0.00192623
47	3.969	0.0277778	1.125	0.000166123
48	3.969	0.0277778	1.121	7.90123e-05

## Sheet: 7. HYM21P3
ROI No.	ROI area (μm2)	Relative weight%	Mean 16O1H/30Si	(Mean - Weighted average)2		Bridgmanite 16O1H/30Si	Weighted. SD	Melt 16O1H/30Si	Weighted. SD
1	5.988	0.0820218	0.062	0.000101118		0.0720557	0.0177148	3.86007	0.451735		Raster size: 30 x 30 µm, Image size: 256 x 256 pixels
2	6.276	0.0859667	0.084	0.000142666
3	6.592	0.0902952	0.091	0.000358886
4	6.88	0.0942401	0.072	3.10496e-09
5	6.386	0.0874735	0.091	0.000358886
6	6.496	0.0889802	0.09	0.000321997
7	6.866	0.0940484	0.083	0.000119777
8	7.072	0.0968701	0.074	3.78022e-06
9	6.853	0.0938703	0.058	0.000197563
10	6.647	0.0910486	0.05	0.000486455
11	6.949	0.0951853	0.04	0.00102757
12	3.969	0.0358524	3.395	0.21629
13	3.969	0.0358524	3.461	0.159257
14	3.969	0.0358524	3.456	0.163273
15	3.969	0.0358524	3.869	7.97424e-05
16	3.969	0.0358524	3.513	0.120458
17	3.969	0.0358524	3.944	0.00704422
18	3.969	0.0358524	3.473	0.149823
19	3.969	0.0358524	3.032	0.6857
20	3.955	0.0357259	3.919	0.00347273
21	3.969	0.0358524	3.491	0.136213
22	3.969	0.0358524	4.022	0.0262213
23	3.969	0.0358524	3.905	0.00201869
24	3.969	0.0358524	3.883	0.000525778
25	3.941	0.0355994	3.743	0.0137054
26	3.969	0.0358524	3.636	0.0502074
27	3.969	0.0358524	3.902	0.00175811
28	3.969	0.0358524	4.474	0.37691
29	3.969	0.0358524	4.223	0.131718
30	3.928	0.035482	3.976	0.0134397
31	3.955	0.0357259	4.161	0.0905588
32	3.969	0.0358524	3.809	0.00260816
33	3.969	0.0358524	2.927	0.87062
34	7.773	0.0702143	4.375	0.265153
35	3.941	0.0355994	3.492	0.135476
36	3.928	0.035482	4.223	0.131718
37	3.886	0.0351026	4.708	0.718985
38	3.955	0.0357259	4.74	0.774277

## Sheet: 8. HYM23P1
ROI No.	ROI area (μm2)	Relative weight%	Mean 16O1H/30Si	(Mean - Weighted average)2		Bridgmanite 16O1H/30Si	Weighted. SD	Melt 16O1H/30Si	Weighted. SD
1	4.257	0.0774	0.023	1.22078e-06		0.0218951	0.00323436	0.571051	0.052005		Raster size: 30 x 30 µm, Image size: 256 x 256 pixels
2	4.381	0.0796545	0.022	1.10021e-08
3	4.23	0.0769091	0.026	1.68501e-05
4	4.367	0.0794	0.028	3.72697e-05
5	4.408	0.0801455	0.026	1.68501e-05
6	4.449	0.0808909	0.023	1.22078e-06
7	4.436	0.0806545	0.019	8.38166e-06
8	4.34	0.0789091	0.02	3.59144e-06
9	4.216	0.0766545	0.018	1.51719e-05
10	4.257	0.0774	0.018	1.51719e-05
11	3.859	0.0701636	0.02	3.59144e-06
12	3.831	0.0696545	0.02	3.59144e-06
13	3.969	0.0721636	0.021	8.0122e-07
14	3.969	0.025641	0.468	0.0106196
15	3.969	0.025641	0.516	0.00303064
16	3.969	0.025641	0.548	0.000531362
17	3.969	0.025641	0.593	0.000481746
18	3.969	0.025641	0.621	0.00249487
19	3.969	0.025641	0.617	0.00211128
20	3.969	0.025641	0.626	0.00301936
21	3.969	0.025641	0.661	0.00809077
22	3.969	0.025641	0.642	0.00503372
23	3.969	0.025641	0.603	0.00102072
24	3.969	0.025641	0.515	0.00314175
25	3.969	0.025641	0.546	0.000627567
26	3.969	0.025641	0.612	0.0016768
27	3.969	0.025641	0.638	0.00448213
28	3.969	0.025641	0.637	0.00434923
29	3.969	0.025641	0.618	0.00220418
30	3.969	0.025641	0.625	0.00291046
31	3.969	0.025641	0.593	0.000481746
32	3.969	0.025641	0.566	2.55155e-05
33	3.969	0.025641	0.531	0.00160411
34	3.969	0.025641	0.492	0.00624911
35	3.969	0.025641	0.488	0.00689752
36	3.969	0.025641	0.538	0.00109239
37	3.969	0.025641	0.569	4.20776e-06
38	3.969	0.025641	0.597	0.000673336
39	3.969	0.025641	0.615	0.00193149
40	3.969	0.025641	0.615	0.00193149
41	3.969	0.025641	0.607	0.00129231
42	3.969	0.025641	0.602	0.000957823
43	3.969	0.025641	0.553	0.000325849
44	3.969	0.025641	0.592	0.000438849
45	3.969	0.025641	0.583	0.000142772
46	3.969	0.025641	0.564	4.97206e-05
47	3.969	0.025641	0.547	0.000578464
48	3.969	0.025641	0.534	0.0013728
49	3.969	0.025641	0.48	0.00829034
50	3.969	0.025641	0.506	0.00423167
51	3.969	0.025641	0.511	0.00360616
52	3.969	0.025641	0.502	0.00476808

[truncated: 5 more sheets: 9. HYM23P2, 10. HYM24, 11. HYM29P1, 12. DACYP1, 13. DACYP2]
